# Supplementary material for: Selective inhibition of nuclear export with selinexor in patients with non-Hodgkin lymphoma
Source: Oxford University Press journal article supplement (doi:10.1182/blood-2016-11-750174), 2017-05-04
Supplement: blood-2016-11-750174-1.pdf [file blood-2016-11-750174-1.pdf]

**Table S1. Adverse events per NHL subtype.**

| NHL subtype             | CLL (n=7) |           |        | DLBCL (n=43) |           |         | FL (n=9)  |           |        | Other (n=20) |           |         |
|-------------------------|-----------|-----------|--------|--------------|-----------|---------|-----------|-----------|--------|--------------|-----------|---------|
|                         | Grade 1/2 | Grade 3/4 | Total  | Grade 1/2    | Grade 3/4 | Total   | Grade 1/2 | Grade 3/4 | Total  | Grade 1/2    | Grade 3/4 | Total   |
| <b>Constitutional</b>   |           |           |        |              |           |         |           |           |        |              |           |         |
| Fatigue                 | 4 (57)    |           | 4 (57) | 22 (51)      | 5 (12)    | 27 (63) | 4 (44)    | 1 (11)    | 5 (56) | 9 (45)       | 3 (15)    | 12 (60) |
| Weight loss             | 1 (14)    |           | 1 (14) | 8 (19)       | 2 (5)     | 10 (23) | 5 (56)    |           | 5 (56) | 4 (20)       |           | 4 (20)  |
| <b>Gastrointestinal</b> |           |           |        |              |           |         |           |           |        |              |           |         |
| Nausea                  | 3 (43)    |           | 3 (43) | 31 (72)      | 1 (2)     | 32 (74) | 8 (89)    |           | 8 (89) | 9 (45)       |           | 9 (45)  |
| Anorexia                | 2 (29)    |           | 2 (29) | 27 (63)      | 1 (2)     | 28 (65) | 4 (44)    |           | 4 (44) | 11 (55)      |           | 11 (55) |
| Vomiting                | 1 (14)    |           | 1 (14) | 18 (42)      |           | 18 (42) | 4 (44)    |           | 4 (44) | 6 (30)       |           | 6 (30)  |
| Diarrhoea               | 3 (43)    |           | 3 (43) | 12 (28)      | 2 (5)     | 14 (33) | 5 (56)    |           | 5 (56) | 5 (25)       |           | 5 (25)  |
| Dysgeusia               |           |           |        | 10 (23)      |           | 10 (23) | 2 (22)    |           | 2 (22) | 3 (15)       |           | 3 (15)  |
| Constipation            |           |           |        | 4 (9)        |           | 4 (9)   |           |           |        | 3 (15)       | 1 (5)     | 4 (20)  |
| <b>Hematologic</b>      |           |           |        |              |           |         |           |           |        |              |           |         |
| Thrombocytopenia        |           | 2 (29)    | 2 (29) | 6 (14)       | 21 (49)   | 27 (63) |           | 8 (89)    | 8 (89) | 5 (25)       | 6 (30)    | 11 (55) |
| Anaemia                 | 1 (14)    | 2 (29)    | 3 (43) | 6 (14)       | 11 (26)   | 17 (40) | 2 (22)    | 3 (33)    | 5 (56) | 3 (15)       | 5 (25)    | 8 (40)  |
| Neutropenia             |           |           |        | 4 (9)        | 12 (28)   | 16 (37) | 1 (11)    | 7 (78)    | 8 (89) | 2 (10)       | 6 (30)    | 8 (40)  |
| Leukopenia              |           |           |        | 1 (2)        | 7 (16)    | 8 (19)  |           | 4 (44)    | 4 (44) | 2 (10)       | 2 (10)    | 4 (20)  |
| <b>Metabolic</b>        |           |           |        |              |           |         |           |           |        |              |           |         |
| Hyponatraemia           |           |           |        | 10 (23)      | 3 (7)     | 13 (30) | 2 (22)    |           | 2 (22) | 2 (10)       | 6 (30)    | 8 (40)  |
| <b>Other</b>            |           |           |        |              |           |         |           |           |        |              |           |         |
| Vision blurred          | 1 (14)    |           | 1 (14) | 9 (21)       | 1 (2)     | 10 (23) | 2 (22)    |           | 2 (22) | 3 (15)       | 1 (5)     | 4 (20)  |
| Dizziness               |           |           |        | 8 (19)       |           | 8 (19)  | 3 (33)    |           | 3 (33) | 2 (10)       |           | 2 (10)  |
| Muscular weakness       | 1 (14)    |           | 1 (14) | 3 (7)        |           | 3 (7)   | 2 (22)    |           | 2 (22) | 2 (10)       | 1 (5)     | 3 (15)  |

**Table S2. Treatment-Related Serious Adverse Events (SAEs)**

| Disease type | Starting Dose (mg/m <sup>2</sup> ) | SAE Term                    | Grade | Onset Date | End Date  |
|--------------|------------------------------------|-----------------------------|-------|------------|-----------|
| CTCL         | 30                                 | Hyponatremia                | 3     | 18-Apr-14  | 23-Apr-13 |
| CTCL         | 30                                 | Cataracts                   | 4     | 3-Mar-15   | 30-Apr-15 |
| Richter's    | 35                                 | Encephalitis                | 3     | 18-Nov-13  | 19-Nov-13 |
| DLBCL        | 35                                 | Serum amylase increased     | 3     | 20-Jan-14  | 23-Jan-14 |
| DLBCL        | 35                                 | Dehydration                 | 3     | 2-Feb-14   | 13-Feb-14 |
| DLBCL        | 35                                 | Dehydration                 | 3     | 10-Mar-14  | 24-Mar-14 |
| DLBCL        | 35                                 | Febrile neutropenia         | 3     | 18-Aug-14  | 22-Aug-14 |
| DLBCL        | 35                                 | Anemia                      | 4     | 3-Dec-14   | 4-Dec-14  |
| Richter's    | 60                                 | Hyponatremia                | 3     | 22-Apr-14  | 26-Apr-14 |
| DLBCL        | 70                                 | Confusion                   | 3     | 9-Jun-14   | 3-Jul-14  |
| FL           | 70                                 | Ejection fraction decreased | 3     | 16-Aug-14  | 23-Aug-14 |

Figure S1. Selinexor pharmacokinetics.

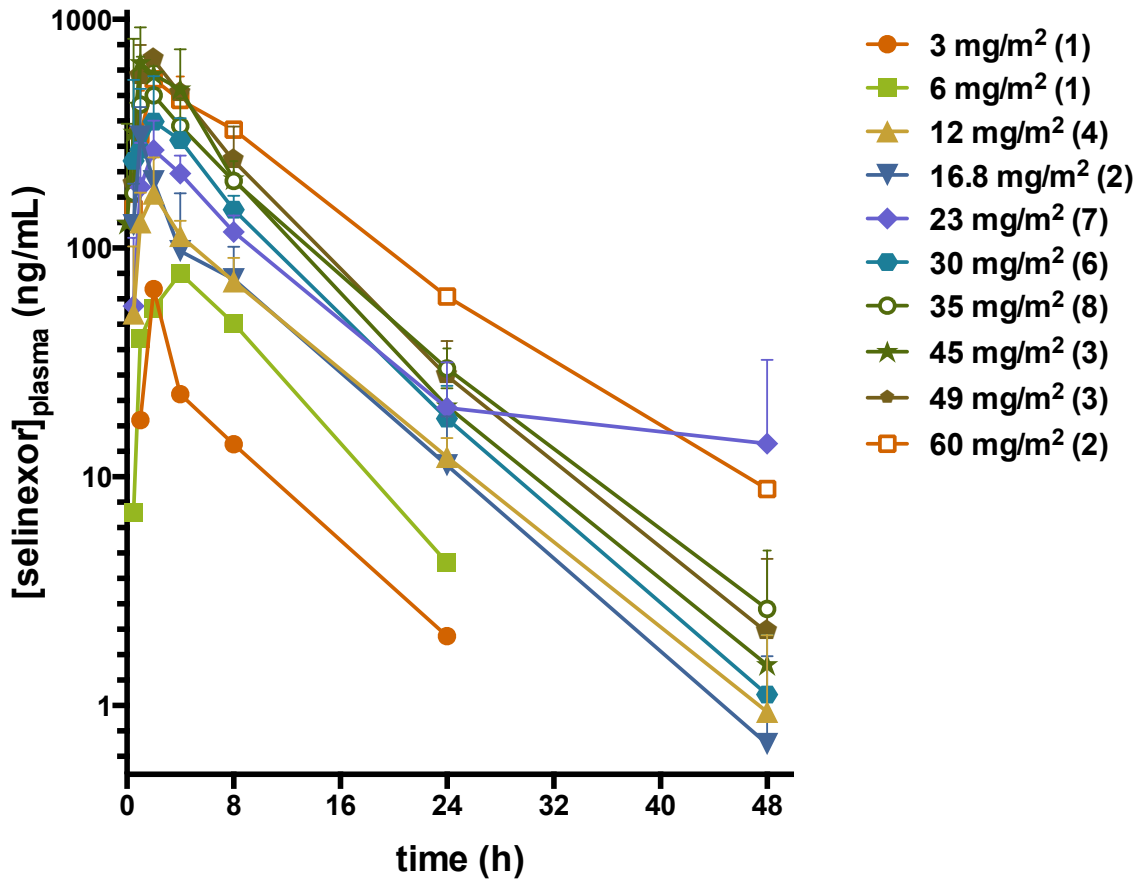

Selinexor plasma concentration over a 48 hr time course after the first dose of selinexor, depicted as a function of selinexor dose. Average and std error are shown for each time point and dose, based upon the number of patients listed in the graph legend.

**Table S3. Selinexor pharmacokinetics**

| Selinexor dose (mg/m <sup>2</sup> ) |                                 | 3    | 6    | 12         | 16.8       | 23         | 30         | 35          | 45         | 49          | 60         | Dose proportionality (r <sup>2</sup> ) |
|-------------------------------------|---------------------------------|------|------|------------|------------|------------|------------|-------------|------------|-------------|------------|----------------------------------------|
| Dose 1                              | No. of patients                 | 1    | 1    | 3          | 2          | 6          | 6          | 8           | 3          | 3           | 2          |                                        |
|                                     | C <sub>max</sub> (ng/mL)        | 66   | 78   | 193 ± 80   | 245 ± 68   | 291 ± 78   | 467 ± 147  | 517 ± 193   | 791 ± 87   | 701 ± 56    | 547 ± 171  | 0.69                                   |
|                                     | T <sub>max</sub> (hr)           | 2.0  | 4.0  | 2.7 ± 1.2  | 1.0 ± 1.7  | 1.7 ± 0.5  | 2.6 ± 1.5  | 1.8 ± 1.2   | 1.8 ± 1.5  | 1.7 ± 0.6   | 2.0 ± 0.6  | 0.03                                   |
|                                     | AUC <sub>0-24h</sub> (hr*ng/mL) | 209  | 442  | 924 ± 135  | 1154 ± 197 | 1468 ± 278 | 1892 ± 490 | 2521 ± 837  | 3039 ± 608 | 3406 ± 436  | 3119 ± 721 | 0.76                                   |
|                                     | AUC <sub>0-48h</sub> (hr*ng/mL) | 337  | 851  | 1781 ± 105 | 2078 ± 201 | 3043 ± 599 | 3129 ± 670 | 4691 ± 1215 | 5810 ± 897 | 5844 ± 1475 | 7568 ± 304 | 0.78                                   |
|                                     | t <sub>1/2</sub> (hr)           | 5.7  | 4.7  | 7.0 ± 0.5  | 5.8 ± 1.2  | 8.7 ± 3.2  | 5.3 ± 2.2  | 6.5 ± 1.4   | 5.5 ± 0.4  | 5.5 ± 1.3   | 7.8 ± 1.8  | <0.0001                                |
|                                     | V <sub>d</sub> (L/kg)           | 1954 | 1279 | 1824 ± 209 | 1818 ± 107 | 2783 ± 996 | 2041 ± 589 | 2013 ± 626  | 1722 ± 358 | 1848 ± 388  | 2409 ± 707 | 0.006                                  |
| Dose 5, 7 or 8                      | No. of patients                 | 1    | 1    | 3          | 1          | 3          | 5          | 5           | 1          | 2           | 1          |                                        |
|                                     | Dose number                     | 8    | 7    | 7          | 7          | 5          | 7          | 5           | 5          | 5           | 5          |                                        |
|                                     | C <sub>max</sub> (ng/mL)        | 72   | 158  | 169 ± 72   | 185        | 386 ± 192  | 393 ± 142  | 511 ± 105   | 746        | 537 ± 1     | 577        | 0.62                                   |
|                                     | T <sub>max</sub> (hr)           | 2    | 1    | 4.7 ± 3.1  | 4          | 1.3 ± 0.6  | 2.8 ± 1.1  | 3.2 ± 1.1   | 1.0        | 2.5 ± 2.1   | 2          | 0.01                                   |
|                                     | AUC <sub>0-24h</sub> (hr*ng/mL) | 250  | 550  | 809 ± 340  | 1253       | 1488 ± 451 | 1876 ± 543 | 2210 ± 483  | 2948       | 3059 ± 417  | 3429       | 0.80                                   |

A.

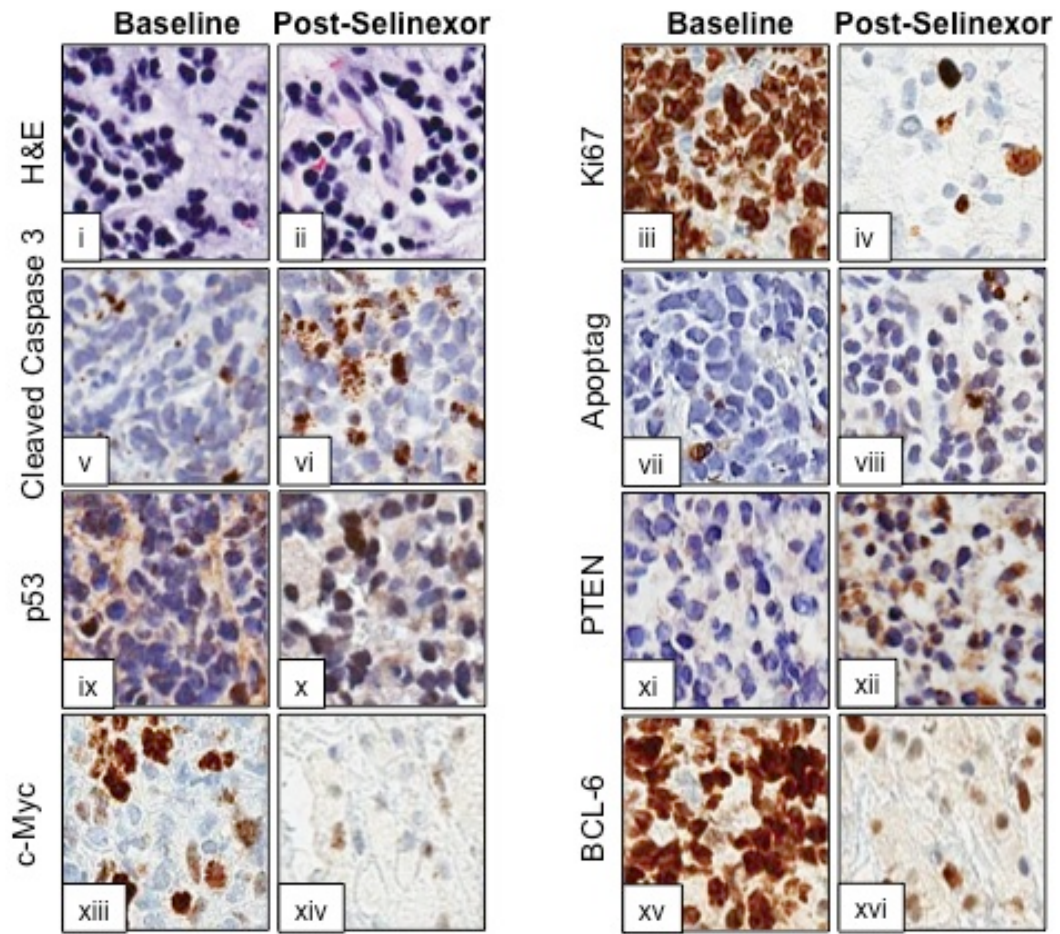

B.

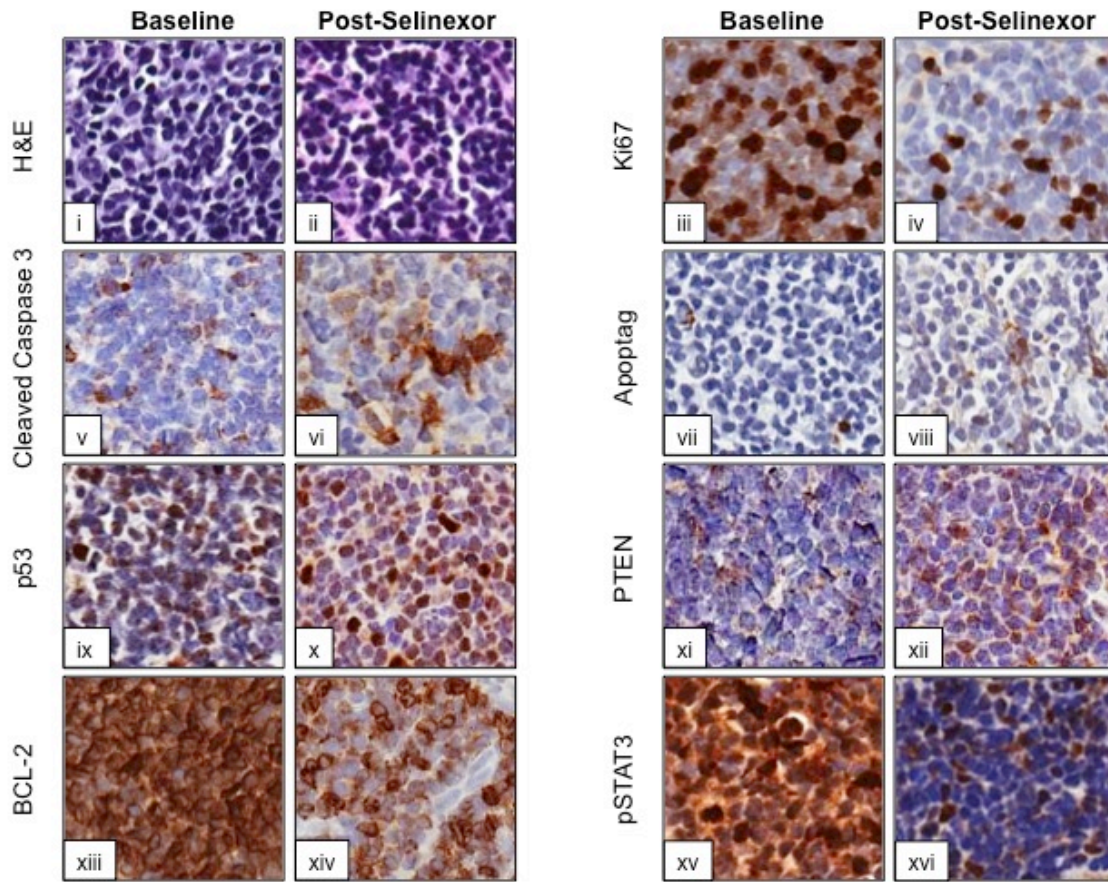

**Figure S2. Immunohistochemistry for markers of proliferation, apoptosis and XPO1 cargos**

Liver tumor biopsy from a patient with DLBCL obtained 8 days prior (baseline) and 5 weeks after selinexor treatment. The patient was treated with 60 mg/m<sup>2</sup> and showed a best response of PR with an overall 52% reduction in target lesion size from baseline. Comparative IHC analysis was performed on tumor sections for H&E (i&ii), markers of proliferation (Ki67-iii&iv), apoptosis (cleaved caspase 3-v&vi; Apoptag-vii&viii), XPO1 cargo proteins (p53-ix&x; PTEN (xi&xii) and key growth and survival factors (c-Myc-xiii&xiv, Bcl-6-xv&xvi). B. Lymph node tumor biopsy from a patient with FL obtained 3 days prior (baseline) and 5 weeks after selinexor treatment. The patient was treated



with 49 mg/m<sup>2</sup> and showed a best response of PR with a 79% reduction in target lesion size from baseline. Comparative IHC analysis was performed on tumor sections for H&E (i,ii) markers of proliferation (Ki67-iii,iv), apoptosis (cleaved caspase 3-v,vi), XPO1 cargo proteins (p53-ix,x; PTEN-xi, xii) and key factors involved in growth and survival (Bcl-2-xiii,xiv; STAT3 P-S727-xv,xvi).

**Figure S3. Scans of a patient with relapsed DLBCL treated with selinexor.**

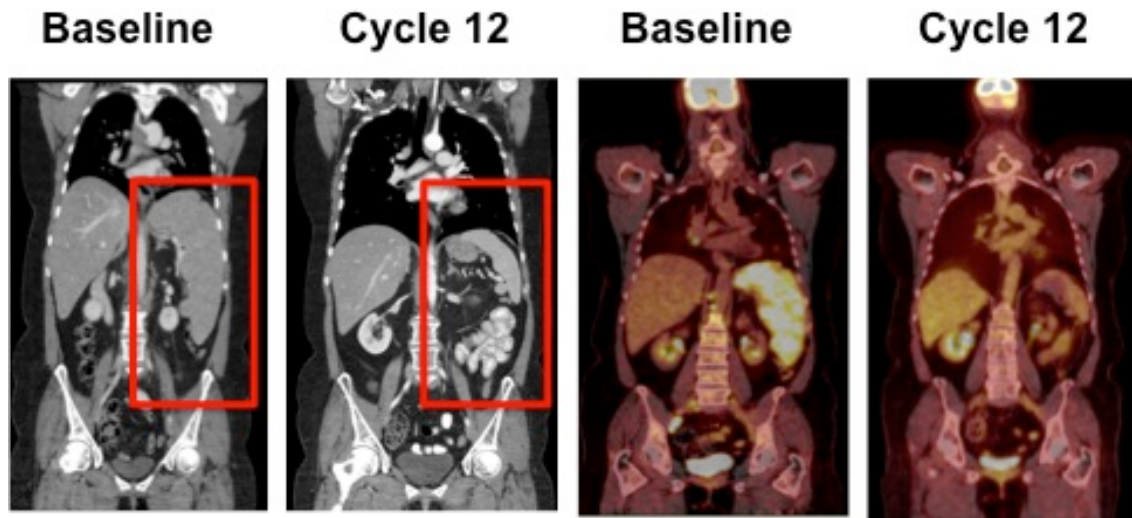

A 51-year old, female with Stage IV relapsed DLBCL treated with 4 prior therapeutic regimens (R-CHOP, etoposide/cyclophosphamide, SCT and panobinostat, respectively) was administered 35 mg/m<sup>2</sup> selinexor twice weekly. She showed a 74% reduction in tumor volume by MRI within 2 cycles and was declared a CR and PET-CT negative after 12 cycles of selinexor. As of the close of study, the patient was alive and disease free, having received selinexor for over 35 months.
